# Supplementary material for: Electric field modulated ion-sieving effects of graphene oxide membranes
Source: Royal Society of Chemistry journal article supplement (doi:10.1039/d0ta09109j), 2020-11-30
Supplement: d0ta09109j1.pdf [file d0ta09109j1.pdf]

## Supplementary information

### Electric Field Modulated Ion-sieving Effects of Graphene Oxide Membranes

*Zhi Yi Leong<sup>1</sup>, Zhaojun Han<sup>2,3</sup>, Guangzhao Wang<sup>4</sup>, Dong-Sheng Li<sup>5</sup>, Shengyuan A. Yang<sup>4</sup>,  
Hui Ying Yang<sup>1\*</sup>*

<sup>1</sup>Pillar of Engineering Product Development (EPD), Singapore University of Technology and Design, 8 Somapah Road, 487372, Singapore. E-mail: yanghuiying@sutd.edu.sg

<sup>2</sup>School of Chemical Engineering, University of New South Wales, Kensington, New South Wales 2052, Australia.

<sup>3</sup>CSIRO Manufacturing, 36 Bradfield Road, Lindfield, New South Wales 2070, Australia.

<sup>4</sup>Science and Math Cluster, Singapore University of Technology and Design, 8 Somapah Road, Singapore 487372, Singapore.

<sup>5</sup>College of Materials and Chemical Engineering, Key Laboratory of Inorganic Nonmetallic Crystalline and Energy Conversion Materials, China Three Gorges University, Yichang, 443002, P. R. China

| Feed solution | K <sup>+</sup> (mM) | Na <sup>+</sup> (mM) | Ca <sup>2+</sup> (mM) | Mg <sup>2+</sup> (mM) |
|---------------|---------------------|----------------------|-----------------------|-----------------------|
| F1            | 1                   | -                    | 1                     | -                     |
| F2            | 1                   | -                    | -                     | 1                     |
| F3            | -                   | 1                    | 1                     | -                     |
| F4            | -                   | 1                    | -                     | 1                     |

**Table. S1** Description of feed solutions used.

| Ion              | Valence | Ionic mass (amu) <sup>1</sup> | Hydrated radius (Å) <sup>2</sup> | Hydration energy (kJ mol <sup>-1</sup> ) <sup>3</sup> |
|------------------|---------|-------------------------------|----------------------------------|-------------------------------------------------------|
| K <sup>+</sup>   | +1      | 39.098                        | 3.31                             | -295                                                  |
| Na <sup>+</sup>  | +1      | 22.99                         | 3.58                             | -365                                                  |
| Ca <sup>2+</sup> | +2      | 40.078                        | 4.12                             | -1505                                                 |
| Mg <sup>2+</sup> | +2      | 24.305                        | 4.28                             | -1830                                                 |

**Table. S2** Ion properties of cations used<sup>1-3</sup>.

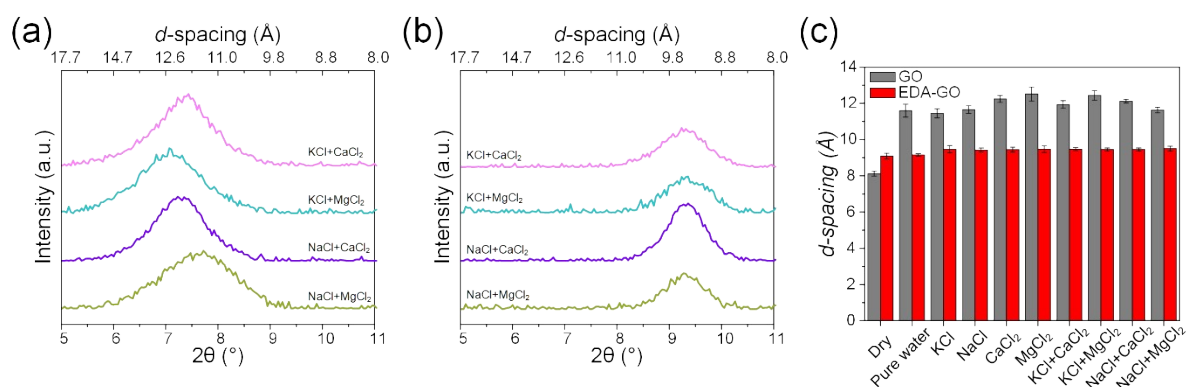

**Fig. S1** XRD results of (a) GO and (b) EDA-GO membrane immersed in mixed 1 mmol monovalent and 1 mmol divalent salt solutions as indicated. (c) *d*-spacings of GO and EDA-GO membranes under various conditions as calculated from (001) XRD peaks.

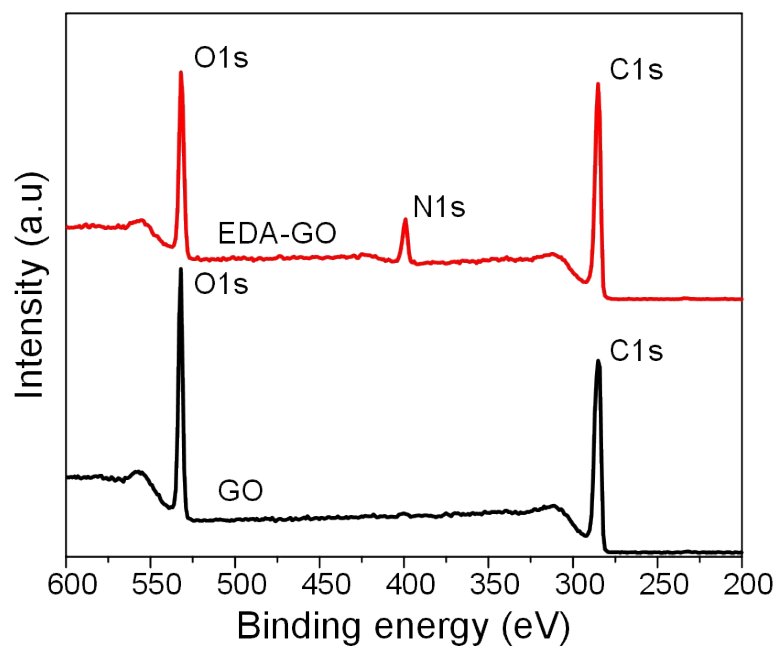

**Fig. S2** Full XPS spectra of GO and EDA-GO membranes.

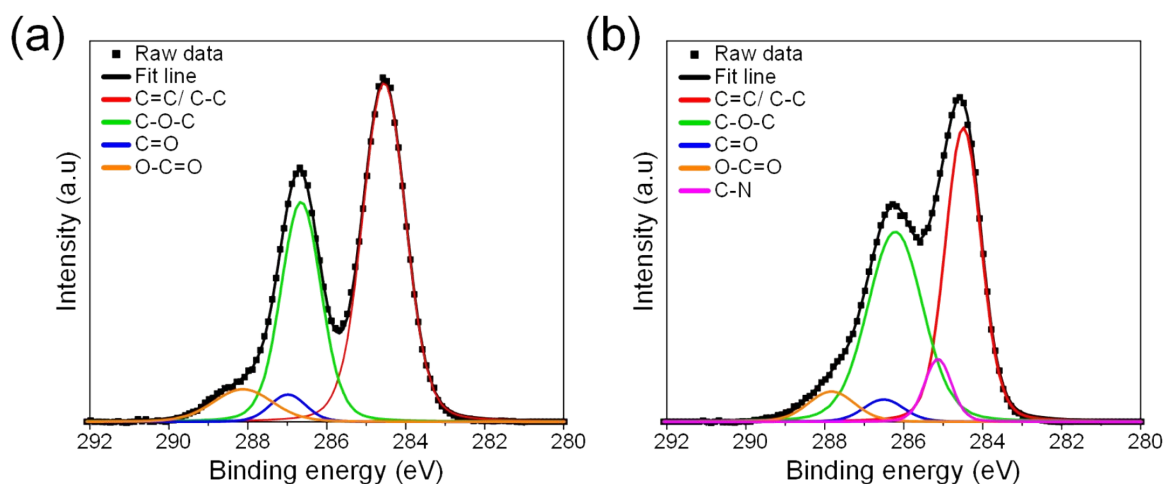

**Fig. S3** C1s XPS spectra of (a) GO and (b) EDA-GO membranes.

|         | GO (at%) | EDA-GO (at%) |
|---------|----------|--------------|
| C=C/C-C | 55.4     | 42.3         |
| C-O-C   | 33.6     | 41.7         |
| C=O     | 3.72     | 3.59         |
| O-C=O   | 7.28     | 5.6          |
| C-N     | -        | 6.81         |

**Table. S3** Atomic percent concentration of peaks in C1s spectrum.

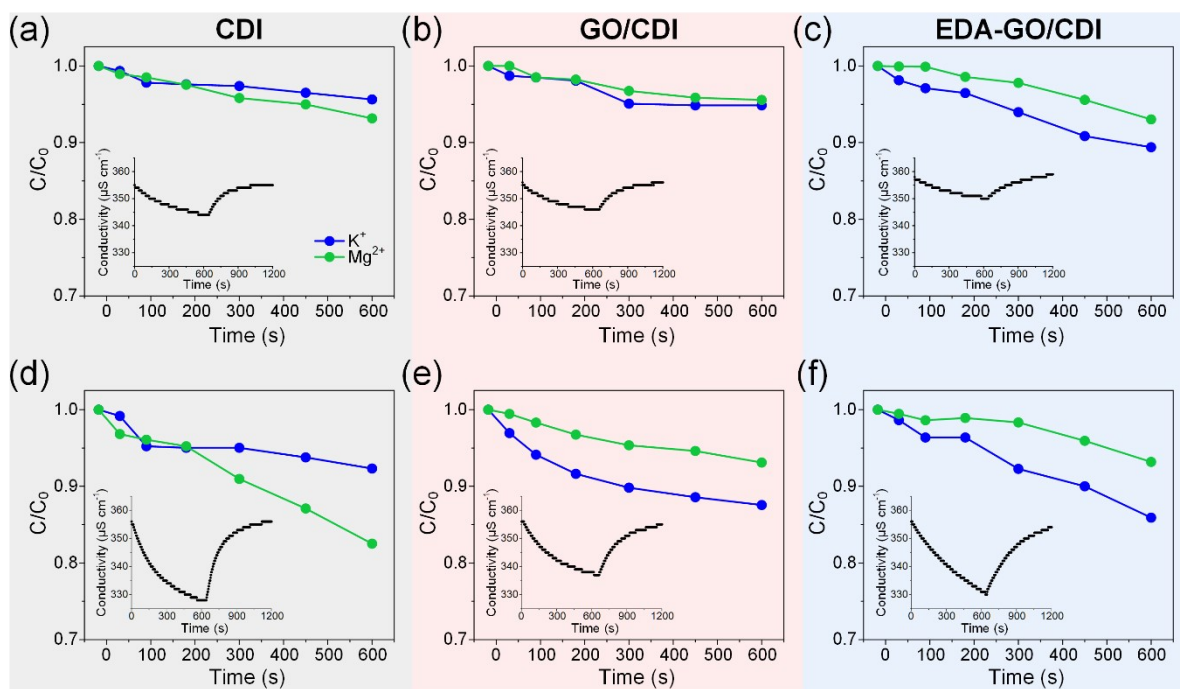

**Fig. S4** Normalised half-cycle cation adsorption curves for CDI (grey area), GO/CDI (red area) and EDA-GO/CDI (blue area) using feed solution F2. Top row (a – c): 0.8 V. Bottom row (d – f): 1.2 V. Inserts are corresponding full-cycle conductivity curves.

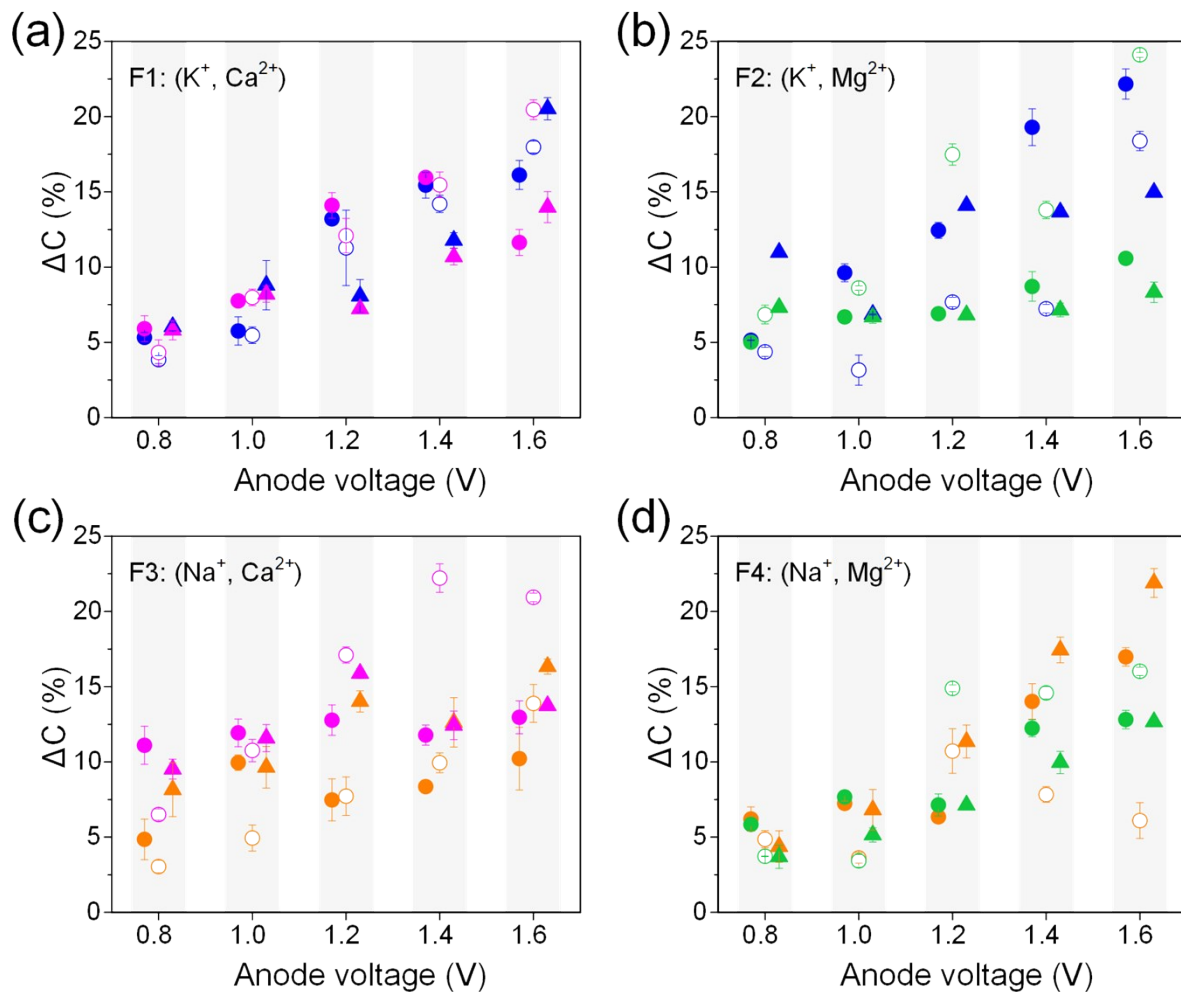

**Fig. S5** Concentration change of effluent solution under positive anode voltage for feed solution (a) F1, (b) F2, (c) F3 and (d) F4. Empty circles ( $\circ$ ) denote CDI, filled circles ( $\bullet$ ) denote GO/CDI and filled triangles ( $\blacktriangle$ ) denote EDA-GO/CDI. Blue represents  $K^+$ , orange represents  $Na^+$ , magenta represents  $Ca^{2+}$  and green represents  $Mg^{2+}$ . Data points of GO/CDI and EDA-GO/CDI were offset for clarity and error bars denote standard deviations.

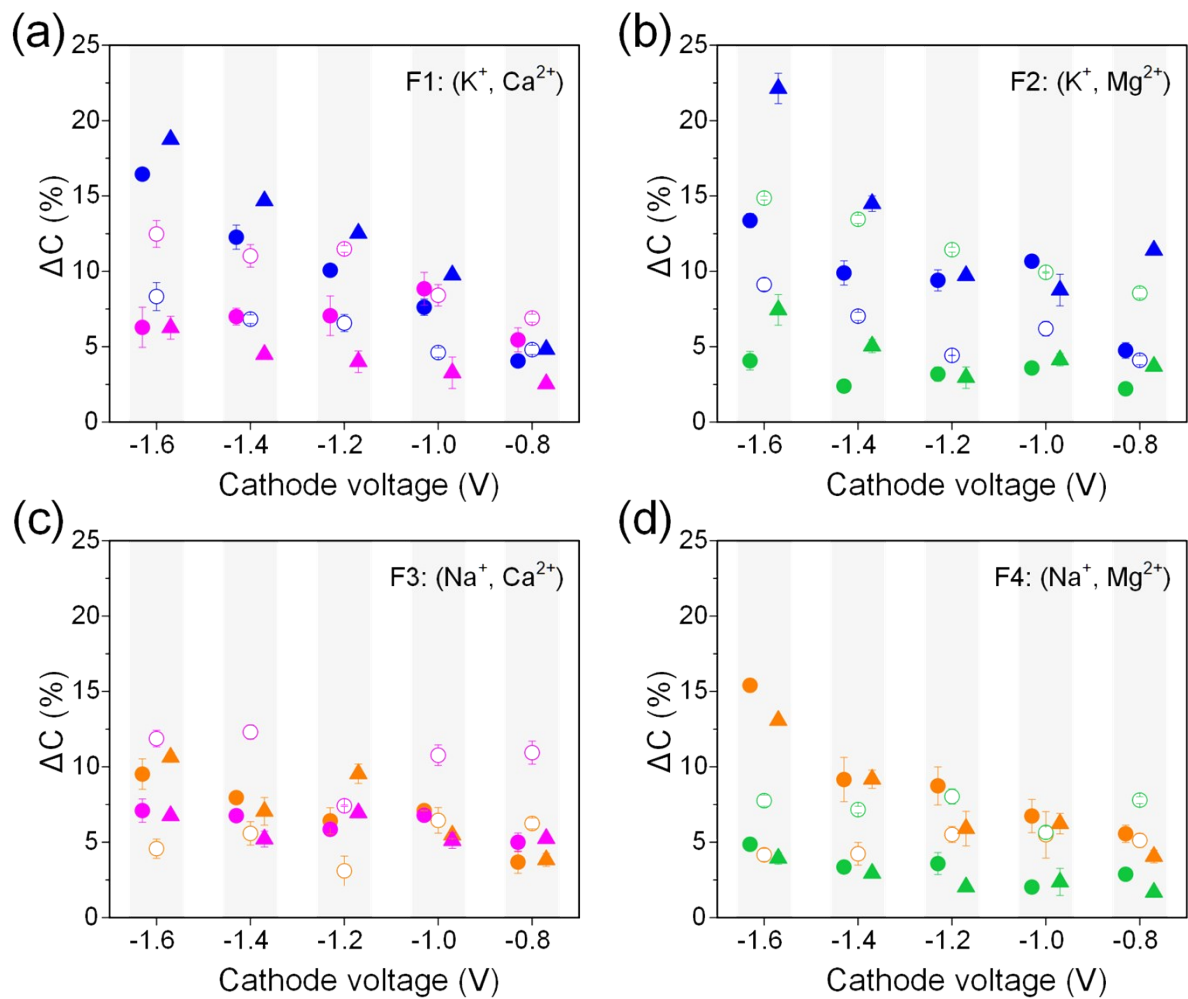

**Fig. S6** Concentration change of effluent solution under negative cathode voltage for feed solution (a) F1, (b) F2, (c) F3 and (d) F4. Empty circles ( $\circ$ ) denote CDI, filled circles ( $\bullet$ ) denote GO/CDI and filled triangles ( $\blacktriangle$ ) denote EDA-GO/CDI. Blue represents  $K^+$ , orange represents  $Na^+$ , magenta represents  $Ca^{2+}$  and green represents  $Mg^{2+}$ . Data points of GO/CDI and EDA-GO/CDI were offset for clarity and error bars denote standard deviations.

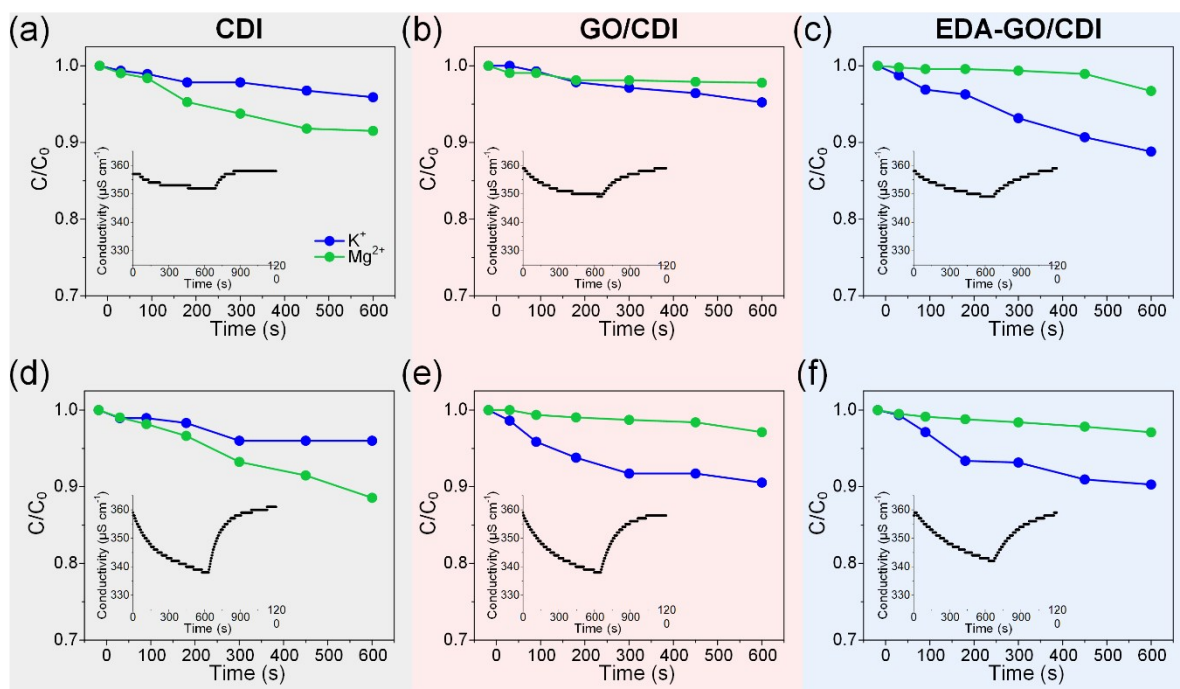

**Fig. S7** Normalised half-cycle cation adsorption curves for CDI (grey area), GO/CDI (red area) and EDA-GO/CDI (blue area) using feed solution F2. Top row (a – c): -0.8 V. Bottom row (d – f): -1.2 V. Inserts are corresponding full-cycle conductivity curves.

## References

1. Lide DR. *CRC handbook of chemistry and physics: a ready-reference book of chemical and physical data*. CRC press (1995).
2. Nightingale Jr E. Phenomenological theory of ion solvation. Effective radii of hydrated ions. *The Journal of Physical Chemistry* **63**, 1381-1387 (1959).
3. Babu CS, Lim C. Theory of ionic hydration: Insights from molecular dynamics simulations and experiment. *The Journal of Physical Chemistry B* **103**, 7958-7968 (1999).
